# Supplementary material
Source: Springer Nature journal article supplement (https://www.springermedizin.de/resource/supplementary/12960_2012_321_MOESM2_ESM.pdf/9569850)

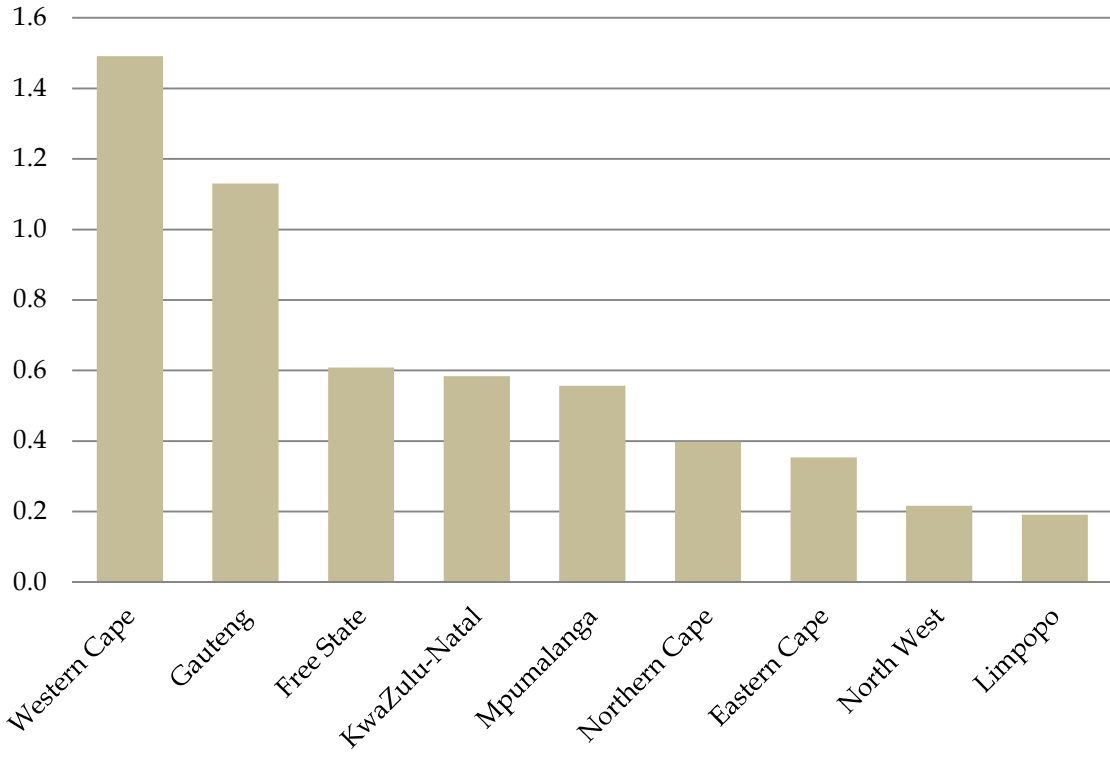

Supplement: MOESM2 [file 9569850]
